# Supplementary material
Source: publisher site journal article supplement (https://www.dovepress.com/article/481398)
Supplement: Supplementary file 1 [file get_supplementary_file.php]

Supplementary Material

**1 Supplementary Table**

Consolidated criteria for reporting qualitative studies (COREQ): 32-item checklist

| **No** | **Item** | **Guide questions/description** | **Reported on Page No.** |
| --- | --- | --- | --- |
| **Domain 1: Research team and reflexivity**  *Personal Characteristics* | | | |
| 1 | Interviewer/facilitator | Which author/s conducted the interview or focus group? | Page 3 |
| 2 | Credentials | What were the researcher’s credentials? E.g. PhD, MD | Page 3 |
| 3 | Occupation | What was their occupation at the time of the study? | Page 3 |
| 4 | Gender | Was the researcher male or female? | Page 3 |
| 5 | Experience and training | What experience or training did the researcher have? | Page 3 |
| *Relationship with participants* | | | |
| 6 | Relationship established | Was a relationship established prior to study commencement? | Page 3 |
| 7 | Participant knowledge of the  interviewer | What did the participants know about the researcher? e.g. personal goals, reasons for doing the research | Page 3 |
| 8 | Interviewer characteristics | What characteristics were reported about the interviewer/facilitator? e.g. Bias, assumptions, reasons and interests in the research topic | Page 3 |
| **Domain 2: Study design**  *Theoretical Framework* | | | |
| 9 | Methodological orientation and Theory | What methodological orientation was stated to underpin the study? e.g. grounded theory, discourse analysis, ethnography, phenomenology, content analysis | Page 2 and 3 |
| *Participant selection* | | | |
| 10 | Sampling | How were participants selected? e.g. purposive, convenience, consecutive, snowball | Page 3 |
| 11 | Method of approach | How were participants approached? e.g. face-to-face, telephone, mail, email | Page 3 |
| 12 | Sample size | How many participants were in the study? | Page 4 |
| 13 | Non-participation | How many people refused to participate or dropped out? Reasons? | Page 4 |
| *Setting* | | | |
| 14 | Setting of data collection | Where was the data collected? e.g. home, clinic, workplace | Page 3 |
| 15 | Presence of non-participants | Was anyone else present besides the participants and researchers? | Page 3 |
| 16 | Description of sample | What are the important characteristics of the sample? e.g. demographic data, date | Table 1 |
| *Data collection* | | | |
| 17 | Interview guide | Were questions, prompts, guides provided by the authors? Was it pilot tested? | Supplementary Material  Page 3 |
| 18 | Repeat interviews | Were repeat interviews carried out? If yes, how many? | Page 4 |
| 19 | Audio/visual recording | Did the research use audio or visual recording to collect the data? | Page 3 |
| 20 | Field notes | Were field notes made during and/or after the interview or focus group? | Page 3 |
| 21 | Duration | What was the duration of the interviews or focus group? | Page 4 |
| 22 | Data saturation | Was data saturation discussed? | Page 3 |
| 23 | Transcripts returned | Were transcripts returned to participants for comment and/or correction? | Page 4 |
| **Domain 3: Analysis and findings**  *Data analysis* | | | |
| 24 | Number of data coders | How many data coders coded the data? | Page 4 |
| 25 | Description of the coding tree | Did authors provide a description of the coding tree? | Page 4 |
| 26 | Derivation of themes | Were themes identified in advance or derived from the data? | Page 4 |
| 27 | Software | What software, if applicable, was used to manage the data? | Page 3 |
| 28 | Participant checking | Did participants provide feedback on the findings? | Page 4 |
| *Reporting* | | | |
| 29 | Quotations presented | Were participant quotations presented to illustrate the themes / findings? Was each quotation identified? e.g. participant number | Results section page 4 to 11 |
| 30 | Data and findings consistent | Was there consistency between the data presented and the findings? | Page 6 |
| 31 | Clarity of major themes | Were major themes clearly presented in the findings? | Figure 4 |
| 32 | Clarity of minor themes | Is there a description of  diverse cases or discussion of minor themes? | Page 4-5 |

Developed from: Tong A, Sainsbury P, Craig J. Consolidated criteria for reporting qualitative research (COREQ): a 32-item checklist for interviews and focus groups. International Journal for Quality in Health Care. 2007. Volume 19, Number 6: pp. 349 – 357

**2 Supplementary Material**

**INTERVIEW GUIDE [English version]: *Toward multidisciplinary tools for complex clinical psychopharmacology cases: a qualitative study with French healthcare professionals***

| What type of profession do you practice? |
| --- |

- Hospital psychiatrist / Hospital somatic physician / Hospital pharmacist / Pharmacovigilant

| How many years of experience do you have in the profession? |
| --- |

- 0-10 years ; 10-20 years ; 20-30 years ; > 30 years

| How do you approach complex psychopharmacological prescriptions (such as situations of molecule ineffectiveness, therapeutic impasse, iatrogenic situations, switch, or other questioning)? |
| --- |

| Do you have any comments or recommendations you would like to make on this subject? |
| --- |

| In your practice, do you encounter complex therapeutic interventions for which the use of easily accessible classical resources and databases in psychopharmacology (e.g., Vidal®, HAS recommendations, etc.) does not allow you to address therapeutic questions quickly and reliably? |
| --- |

- >1/week ; 1-2/month ; <1/month ; <1/quarter of the year ; Never

| In your practice, do you sometimes seek advice from other healthcare professionals to secure and address certain therapeutic interventions? |
| --- |

- >1/week ; 1-2/month ; <1/month ; <1/quarter of the year ; Never

| If yes, with which professional(s)? |
| --- |

| What multidisciplinary tools do you have to address a complex situation and secure the care? |
| --- |

| Do you sometimes feel lacking reliable and secure information when dealing with therapeutic questions in psychopharmacology? |
| --- |

- Very often / Often / Sometimes / Rarely / Never

| What, in your opinion, are the barriers to using multidisciplinary tools for complex situations in psychopharmacology? (Time? Knowledge? Other?) |
| --- |

| Are there situations where seeking advice from another healthcare professional is not sufficient for the complex psychopharmacological situation? |
| --- |

- Very often / Often / Sometimes / Rarely / Never

| In your opinion, what are the most relevant tools to develop to improve these therapeutic interventions? |
| --- |

| Do you think there should be more shared decision-making in therapeutics (*Team-based model* in Anglophone countries)?" |
| --- |

- Strongly agree / Agree / Neutral / Disagree / Strongly disagree
